# Supplementary material for: A Retrospective Medical Record Review of Adults with Non-Cancer Diagnoses Prescribed Medicinal Cannabis
Source: MDPI journal article supplement (doi:10.3390/jcm12041483), 2023-02-13
Supplement: s1 [file s1]

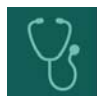

## Supplementary Material

**Table S1.** All patient conditions.

| Condition(s) treated                        | Number of patients (%) <sup>a</sup><br>( <i>n</i> = 157) |
|---------------------------------------------|----------------------------------------------------------|
| <b>Musculoskeletal conditions</b>           | 39 (24.8)                                                |
| Spondylosis                                 | 25 (15.9)                                                |
| Osteoarthritis                              | 6 (3.8)                                                  |
| Osteoporosis                                | 2 (1.3)                                                  |
| Vertebral Fractures                         | 2 (1.3)                                                  |
| Osteomyelitis                               | 1 (0.6)                                                  |
| Mixed arthritic                             | 1 (0.6)                                                  |
| Myositis                                    | 1 (0.6)                                                  |
| Nociceptive spine pain                      | 1 (0.6)                                                  |
| <b>Neurological conditions</b>              | 91 (58.0)                                                |
| Parkinson's disease                         | 23 (14.6)                                                |
| Migraine                                    | 16 (10.2)                                                |
| Multiple sclerosis                          | 10 (6.4)                                                 |
| Peripheral neuropathy                       | 9 (5.7)                                                  |
| Neuropathic pain                            | 9 (5.7)                                                  |
| Epilepsy                                    | 3 (1.9)                                                  |
| Complex regional pain syndrome              | 2 (1.3)                                                  |
| Axonal neuropathy                           | 2 (1.3)                                                  |
| Stiff person syndrome                       | 2 (1.3)                                                  |
| Dystonia                                    | 2 (1.3)                                                  |
| Post herpetic neuralgia                     | 1 (0.6)                                                  |
| Trigeminal neuralgia                        | 1 (0.6)                                                  |
| Posterior femoral cutaneous nerve lesion    | 1 (0.6)                                                  |
| Lower limb spastic paresis                  | 1 (0.6)                                                  |
| Thoracic paraplegia                         | 1 (0.6)                                                  |
| Tardive dyskinesia                          | 1 (0.6)                                                  |
| Ischaemic stroke                            | 1 (0.6)                                                  |
| Corticobasal degeneration                   | 1 (0.6)                                                  |
| Myelitis                                    | 1 (0.6)                                                  |
| Myelopathy                                  | 1 (0.6)                                                  |
| Multiple systems atrophy                    | 1 (0.6)                                                  |
| Phantom limb syndrome                       | 1 (0.6)                                                  |
| Facial onset sensory and motor neuronopathy | 1 (0.6)                                                  |
| <b>Autoimmune conditions</b>                | 14 (8.9)                                                 |
| Systemic lupus erythematosus                | 3 (1.9)                                                  |
| Fibromyalgia <sup>b</sup>                   | 3 (1.9)                                                  |
| Sjogren's syndrome                          | 2 (1.3)                                                  |
| Polymyalgia rheumatica <sup>c</sup>         | 2 (1.3)                                                  |
| Immune arthritis                            | 2 (1.3)                                                  |
| Scleroderma                                 | 1 (0.6)                                                  |
| Rheumatoid arthritis                        | 1 (0.6)                                                  |
| <b>Inflammatory conditions</b>              | 10 (6.4)                                                 |
| Endometriosis                               | 3 (1.9)                                                  |
| Arachnoiditis                               | 2 (1.3)                                                  |

|                                 |                  |
|---------------------------------|------------------|
| Rectal abscess                  | 1 (0.6)          |
| Interstitial cystitis           | 1 (0.6)          |
| Ulcerative colitis              | 1 (0.6)          |
| Pancreatitis                    | 1 (0.6)          |
| Chronic sinusitis               | 1 (0.6)          |
| <b>Mental health conditions</b> | <b>3 (1.9)</b>   |
| Insomnia                        | 2 (1.3)          |
| Post-traumatic stress disorder  | 1 (0.6)          |
| <b>Other</b>                    | <b>23 (14.6)</b> |
| Chronic pain syndrome           | 19 (12.1)        |
| Chronic abdominal pain          | 2 (1.3)          |
| Renal failure                   | 1 (0.6)          |
| Headaches                       | 1 (0.6)          |

<sup>a</sup>Percentages are given as individual frequencies out of the entire study population, as some patients had more than one condition percentages will add to over 100; <sup>b</sup>Not considered an inflammatory disease, with recent research suggesting that fibromyalgia might be an autoimmune disease; <sup>c</sup>Inflammatory disorder that is believed to be an autoimmune disease.

**Table S2.** All patient indications.

| Indication                                         | Number of patients (%) <sup>a</sup> (n = 157) |
|----------------------------------------------------|-----------------------------------------------|
| Pain                                               | 136 (86.6)                                    |
| Muscle spasms                                      | 18 (11.5)                                     |
| Sleep                                              | 10 (6.4)                                      |
| Rigidity                                           | 5 (3.2)                                       |
| Spasticity                                         | 5 (3.2)                                       |
| Anorexia                                           | 5 (3.2)                                       |
| Dystonia                                           | 5 (3.2)                                       |
| Tremors                                            | 4 (2.5)                                       |
| Speech                                             | 4 (2.5)                                       |
| Seizures                                           | 3 (1.9)                                       |
| Dyskinesias                                        | 3 (1.9)                                       |
| Bradykinesia                                       | 3 (1.9)                                       |
| Anxiety                                            | 2 (1.3)                                       |
| Dysphagia                                          | 2 (1.3)                                       |
| Mobility                                           | 2 (1.3)                                       |
| Nausea                                             | 2 (1.3)                                       |
| Burning mouth syndrome                             | 1 (0.6)                                       |
| Tone                                               | 1 (0.6)                                       |
| Clonus                                             | 1 (0.6)                                       |
| Fatigue                                            | 1 (0.6)                                       |
| Weakness                                           | 1 (0.6)                                       |
| Stroke symptoms                                    | 1 (0.6)                                       |
| Stiffness                                          | 1 (0.6)                                       |
| Dry mouth and eyes                                 | 1 (0.6)                                       |
| Restless legs                                      | 1 (0.6)                                       |
| Facial onset sensory and motor neuropathy symptoms | 1 (0.6)                                       |

<sup>a</sup>Percentages are given as individual frequencies out of the entire study population, as some patients had more than one indication percentages will add to over 100.
